# Supplementary material for: Population Size and Human-Grivet Monkeys (Chlorocebus aethiops) Conflict in Zegie Peninsula, Bahir Dar, Ethiopia
Source: Research Square preprint supplement (doi:10.21203/rs.3.rs-127178/v1), 2020-12-18
Supplement: Supplementary file 1 [file 6409a1ca83b08befabb74d00.docx]

**Population Size and Human-Grivet Monkeys (*Chlorocebus aethiops*) Conflict in Zegie Peninsula, Bahir Dar, Ethiopia**

Yibelu Yitayih*1, Dessalegn Ejigu2 and Misganaw Mola1

1Mizan Tepi University, College of Natural and Computational Science, Department of Biology, P.O. Box 121., Tepi Ethiopia

2Bahir Dar University, College of Science, Department of Biology, P.O. Box 79, Bahir Dar, Ethiopia

1Mizan Tepi University, College of Natural and Computational Science, Department of Biology, P.O. Box 121., Tepi Ethiopia

Email: Yibelu Yitayih* - [yibeluyitayih@gmail.com](mailto:yibeluyitayih@gmail.com) ; Dessalegn Ejigu – [kidu2003@gmail.com](mailto:kidu2003@gmail.com); Misganaw Mola - misganawmola@gmail.com

* Corresponding author


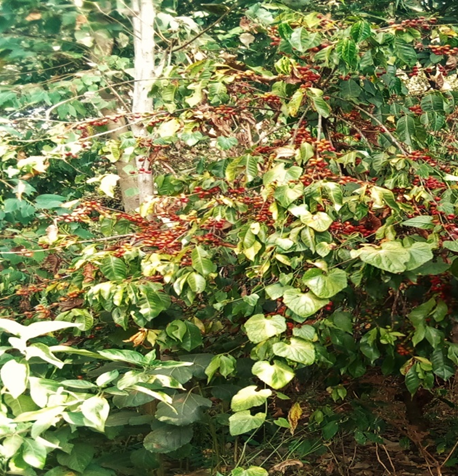

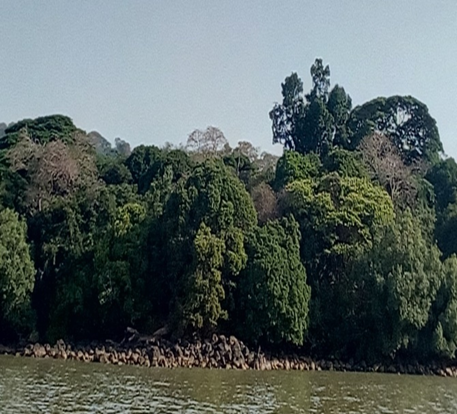

 a. Agricultural area b. Lakeshore habitat


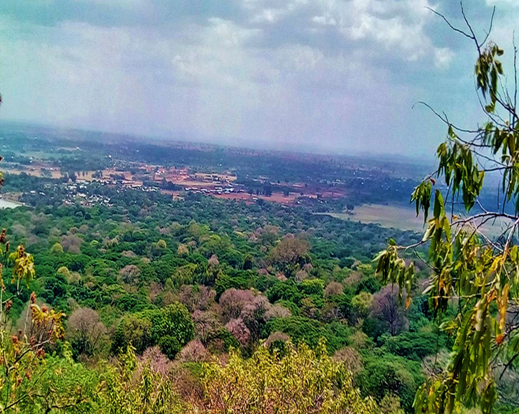

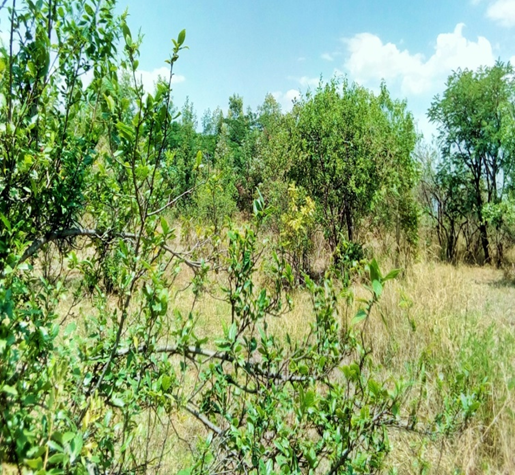

c. Tree dominated forest habitat d. Shrub habitat

Plate1. Different types of habitat in the study area
